# Supplementary material for: Global warming causes sinkhole collapse – Case study in Florida, USA
Source: Copernicus journal article supplement (doi:10.5194/nhess-2018-18), 2018-01-30
Supplement: Supplementary file [file nhess-2018-18-AC2-supplement.pdf]

1 **Global warming causes increased sinkhole collapse– Cases**  
2 **studies in Florida, USA and the Pearl River Delta, China**

3 Yan Meng <sup>a,b,\*</sup>, Long Jia <sup>b</sup>

4 <sup>a</sup> School of environmental studies, China university of Geosciences, Wuhan, 430074,  
5 China

6 <sup>b</sup> Institute of Karst Geology, Chinese Academy of Geological Sciences/Karst  
7 Dynamics Laboratory, MLR & GZAR, CGS, Guilin, 541004, China

8 \* Corresponding author: E-mail: sinkhole@163.com Tel.:+86 07737796682.

9 **Abstract**

10 The occurrence frequency and intensity of many natural geohazards, such as  
11 landslides, debris flows and earthquakes, have increased in response to global  
12 warming. However, the effects of such on development and spread of sinkholes has  
13 been largely overlooked. Most research shows that water pumping and related  
14 drawdown is the most important factor in sinkhole development, but in this paper  
15 evidence is presented which highlights the role played by global warming in causing  
16 more sinkholes. Cases were studied in Florida, USA and the Pearl River Delta of  
17 China. The results show that the four peak “dry” and the three highly phases (i, ii, iii)  
18 of sinkholes is closely related. A prediction equation was also obtained according to  
19 the curve fitting with the correlation coefficient is 0.99, which is of significance for  
20 studying the occurrence and prediction of other sinkhole collapse events and global  
21 warming on an international scale.

22 **Keywords**

23 Sinkhole; Drought index; Karst; Trend prediction; Curve fitting

24 **1. Introduction**

25 Global warming resulting from climate change has altered the occurrence  
26 frequency and intensity of many natural geohazards, including landslides, debris

1 flows and earthquakes (Calbó et al., 2010; Coe and Godt, 2012; Seneviratne et al.,  
2 2012; Gariano and Guzzetti, 2016; Heuvel, et al., 2016; Turkington, et al., 2016;  
3 Yongming Lin, et al., 2017). As an example of the mechanism for this, research has  
4 shown that 5%–10% of global permafrost will melt if global temperatures rise by 2°C,  
5 causing a significant increase in landslides and mudslides (Dong and Jia, 2004).

6 Sinkholes are a widespread type of geohazard, mainly distributed in the United  
7 States, China, Italy, Spain and Russia (Gutiérrez, et al., 2014; Lei, et al., 2015). The  
8 impact of climate change on sinkhole occurrence is expected, because rising  
9 temperatures will change natural hydrological processes (Gabriella Szépszó, et al.,  
10 2014), enhance dissolution of limestone (Mulec and Prelovšek, 2014) and promote  
11 soil failure (Zhou, et al., 2014). Recent reviews in the literature have shown that  
12 sinkhole hazards will probably intensify in the future as a result of climate change  
13 (Rogelio Linares, et al., 2017). **The findings from the case (Thornbush, 2017) study  
14 reveal a high incidence of sinkhole occurrence when temperatures are low in winter  
15 months (especially January). This suggests that temperature (rather than precipitation)  
16 may be the principal driving climatic factor, along with associated human impacts.**  
17 But **the** quantification of **climatic impacts** on sinkholes has been limited. This is  
18 largely because of a lack of long-term hydrological and climate data, and a lack of  
19 representative sinkhole inventories, inclusive of chronological information.

20 **In this paper, the causal effects of global warming on sinkhole development and  
21 intensification are fully investigated using statistical analysis of sinkhole cases in the  
22 state of Florida, USA. There is a strong corresponding relationship between sinkhole  
23 increased after drought and drought indexes (Dry). A prediction equation was also  
24 obtained according to the curve fitting with the correlation coefficient is 0.99.**

## 25 **2. Materials and methods**

### 26 *2.1. Drought index in Florida*

27 Global warming as a result of climate change is a quantifiable phenomenon (Shi et  
28 al., 2010; Gariano, et al., 2016; Turkington, et al., 2016), with a demonstrable increase

1 in global temperatures by  $\sim 0.57^{\circ}\text{C}$  over the last century. It has been reported that the  
2 global surface temperature is likely to rise a further  $0.3$  to  $1.7^{\circ}\text{C}$  in the lowest  
3 emissions scenario during the 21st century, or by  $2.6$  to  $4.8^{\circ}\text{C}$  in the highest emissions  
4 scenario. It is an indisputable fact that global warming has caused drought (IPCC,  
5 2013). Drought index is a measure of drought conditions and calculated based on  
6 rainfall, air temperature, and other meteorological factors (Keetch and Byram, 1968;  
7 Alley, 1984).

8 There are 9 droughts in Florida from 1960 to 2006 (1963, 1967, 1977, 1981, 1987,  
9 1988, 2000, 2002, and 2006) (Fig.1). Drought was most severe in 2000, followed by  
10 1987 and 1963.

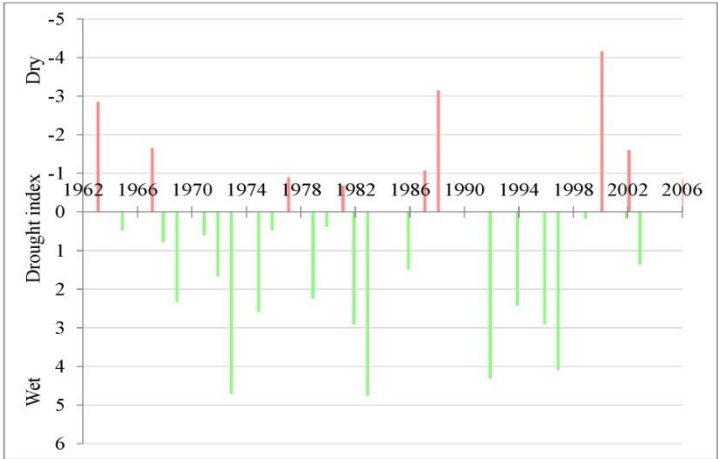

11  
12 **Fig. 1.** Drought indexes from 1960 to 2006 in Florida. The red line is dry, and the  
13 green line is wet

14 *2.2. Sinkhole collapse events in Florida*

15 In Florida, sinkhole collapse events are recorded in the Florida Subsidence Incident  
16 Report, authored by the Florida Geological Survey, which provides a primary publicly  
17 available sinkhole database. More than 2800 sinkholes have been reported in Florida  
18 since the 1950s, and 2767 of them were fully recorded between 1960 and 2006. The  
19 data recorded includes occurrence time, location, shape, dimensions, soil type, side  
20 slope, land use and land cover (Han, et al., 2016). Sinkhole claims were on the rise  
21 from 2006 to 2010. Sinkhole claims jumped from 2360 to 6694 in 2010, according to  
22 a 2010 report by the Florida Office of Insurance Regulation (Fig.2).

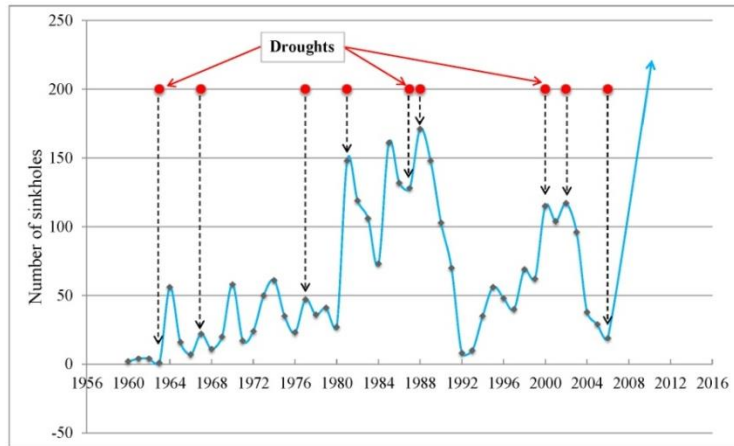

1  
2

**Fig. 2.** Number of sinkholes from 1960 to 2006 in Florida

3 *2.3. Correlation analysis*

4 Sinkhole collapses in the USA from 2006 to 2010 can also be divided into three  
 5 basic consistent peak periods: Phase i between 1963 and 1980, Phase ii between 1980  
 6 and 1992 and Phase iii between 1992 and 2006. From Fig. 3 it is evident that the peak  
 7 time and trend of sinkhole collapse events and drought periods are quite consistent. To  
 8 further investigate the relationship, the association can be quantified using curve  
 9 fitting analysis.

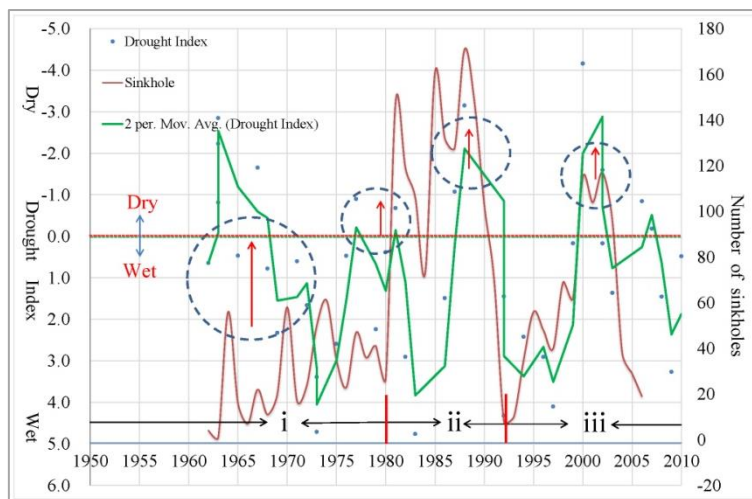

10

11 **Fig.3.** Graphical illustration of the relationship between sinkhole quantity and drought  
 12 in Florida, USA. Note the **four** peak “dry” and the three highly phases (i, ii, iii) of  
 13 sinkholes is closely related.

14 **It is very interesting that the relationship between sinkhole and global change in the**  
 15 **Pearl River Delta of China is very similar to that of the Florida of USA. There is a**

1 strong corresponding relationship between sinkhole quantity and drought index, and  
 2 they are consistent in the peak trend (Fig. 4).

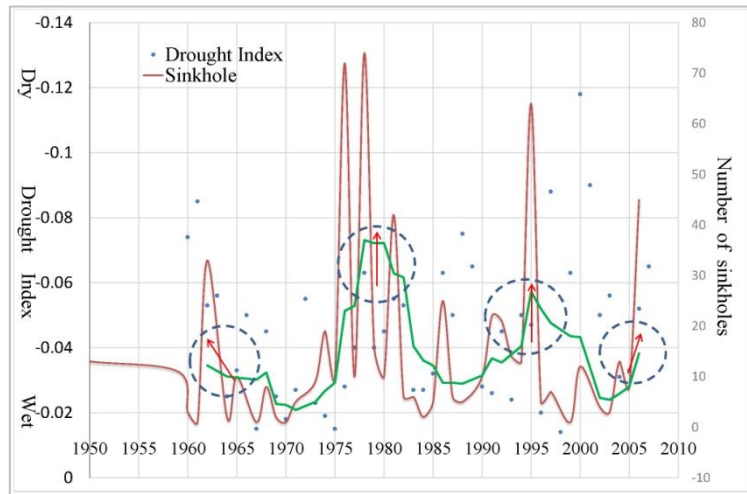

3  
 4 **Fig.4.** Graphical illustration of the relationship between sinkhole quantity and drought  
 5 indexes in the **Pearl River Delta of China**. The green line is drought index average.  
 6 Note the **four** “dry” and “sinkhole” peaks are highly consistent trends.

7 The curve of sinkhole collapse quantity and drought indexes can be fitted, as  
 8 shown in Fig. 4, by Eq. (1).

$$9 \quad \sqrt{((X - B)^2 + (Y - A)^2) - R} = 0 \quad (1)$$

10 The algorithm is derived using the Quasi-Newton (Broyden Fletcher Goldfarb  
 11 Shanno (BFGS) and Universal Global(UG)) methods, where  $X$  is the drought index,  $Y$   
 12 is the number of sinkhole collapses and  $A$ ,  $B$  and  $R$  are constant parameters. The  
 13 correlation coefficient is 0.99. The other parameters are shown in Table 1.

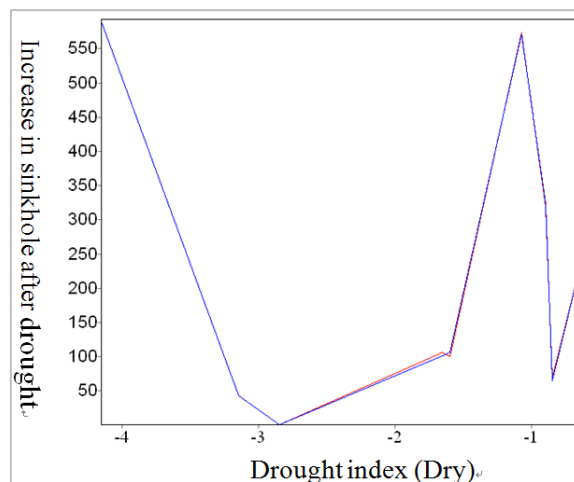

14  
 15 **Fig. 4.** Fitted curves of increase in sinkhole after drought and drought index (Dry).  
 16 The blue line is target, the red line is calculated, the correlation coefficient is 0.99.

1 **Table 1** Algorithm and parameters of the drought time curve.

| Equation                 | $\text{Sqrt}((X-B)^2 + (Y-A)^2) - R=0$ |          |                                                                           |
|--------------------------|----------------------------------------|----------|---------------------------------------------------------------------------|
| Algorithm and parameters | A                                      | 173.499  | Optimization: Quasi-Newton Method(BFGS) + Universal Global                |
|                          | B                                      | 8100.396 | Calculation End: Meet convergence criteria                                |
|                          | R                                      | 8100.217 | Mean square error(RMSE): 2.17562755356349                                 |
|                          |                                        |          | Residual sum of squares (SSE): 127.800591799266                           |
|                          |                                        |          | Correlation coefficient(R): 0.999689237322014                             |
|                          |                                        |          | The square of Correlation coefficient (R <sup>2</sup> ): 0.99937857121747 |
|                          |                                        |          | Determine the coefficient(DC): 0.999378190981562                          |
|                          |                                        |          | Chi-Square coefficient: 0.958830651014433                                 |
|                          |                                        |          | F-Statistic: 40204.8713912301                                             |

2 **3. Results**

3 Macroscopically, the number and frequency of sinkholes increased with global  
 4 warming from 1960 to 2006 in the Pearl River Delta of China and Florida, USA.

5 There is a strong corresponding relationship between sinkhole quantity and drought  
 6 index shown in Fig.3 and Fig.4, which demonstrates the link between global warming  
 7 and increased development of sinkhole collapse events. The four peak “dry” and the  
 8 three highly phases (i, ii, iii) of sinkholes is closely related.

9 To clearly define the quantitative relationship between sinkhole increased after  
 10 drought and drought index (Dry), a curve fitting method was applied based on the  
 11 optimization of Quasi-Newton (BFGS) and Universal Global methods. A prediction  
 12 equation (Eq. 1) was also obtained according to the curve fitting with the correlation  
 13 coefficient is 0.99.

14 **4. Discussion**

15 Most research has shown that pumping of water and associated drawdown is the  
 16 leading cause of sinkhole formation and collapse (Anikeev and Leonenko, 2014;  
 17 Youssef, et al., 2016; Rogelio Linares, et al., 2017). However, the impact of global  
 18 warming should not be more ignored than human impacts. For example, altered global  
 19 rainfall patterns and increasing evaporation because of higher temperatures leads to a  
 20 decrease in groundwater flow, resulting in sinkhole formation, or such decreased flow

1 may lead to intensification of water pumping and related drawdown in urban and  
2 industrial areas that in itself leads to groundwater level reduction and related sinkhole  
3 development.

4 Also, the addition of greenhouse gases to the atmosphere and global warming  
5 increase the dissolution of bedrock, thus increasing the intensity and frequency of  
6 sinkhole collapse (Yuan, 1997). This is especially true for areas underlain by  
7 limestone or dolomite, in which the basic carbonate dissolution formula  $\text{CaCO}_3 + 2\text{H}^+$   
8  $\rightarrow \text{Ca}^{2+} + \text{H}_2\text{O} + \text{CO}_2$  shows the breakdown of solid carbonates in acidic conditions.  
9 The carbonate dissolution formula is reversible, but will proceed in the positive  
10 direction as temperatures increase. In susceptible areas, some closed or previously  
11 blocked karst pipes or cracks will open up under conditions of dissolution, and form  
12 new soil erosion channels. Dehydration of the soil will occur as the temperature  
13 increases, and once runoff occurs or water levels rise, the dry soil will be removed,  
14 leading to erosion and disintegration as the sinkhole forms and collapses.

15 The timing of sinkhole formation lags behind the drought by hours or years along  
16 with human activities, which is geologically sensible, given that water pumping and  
17 drawdown, along with soil runoff caused by rainstorm, will take some time after the  
18 onset of drought before the sinkhole opens.

19 This is significant for use by government disaster reduction departments, or  
20 insurers, who may require forward-modeling of likely future events, such as sinkhole  
21 collapses following periods of drought. This will allow for controls of sinkhole  
22 collapse to be established and to develop monitoring networks.

23 It can be concluded that, if a drought period is forecast, the sinkhole quantity may  
24 also be forecast using the equation, and similarly, areas in which quantities of  
25 sinkholes are increasing may be considered clear subjects of the impacts of global  
26 warming.

## 27 **Acknowledgements**

28 This research was supported by the National Natural Science Foundation of China  
29 (41302255, 41402284), China Geological Survey Project (1212011220192). We thank

1 Warwick Hastie, PhD, from Liwen Bianji, Edanz Group China  
2 (www.liwenbianji.cn/ac), for editing the English text of a draft of this manuscript.

### 3 **References**

4 Ahmed M. Youssef., Hasan M. Al-Harbi., Francisco Gutiérrez., Yasser A. Zabramwi., Ali B.  
5 Bulkhi., Saeed A. Zahrani., Alaa M. Bahamil., Ahmed J. Zahrani., Zaaam A. Otaibi., Bosy A. El-  
6 Haddad (2016) Natural and human-induced sinkhole hazards in Saudi Arabia: distribution,  
7 investigation, causes and impacts. *Hydrogeology Journal* 3: 625–644.

8 **Alley, W.M., (1984) The Palmer Drought Severity Index: limitations and assumptions. *Journal***  
9 **of Climate and Applied Meteorology, 23: 1100–1109.**

10 Anikeev, A.V., Leonenko, M.V (2014) Forecast of sinkhole development caused by changes in  
11 hydrodynamic regime: Case study of Dzerzhinsk Karst Area. *Water Resources* 7:819–832.

12 Calbó, J., Sánchez-Lorenzo, A., Cunillera, J., Barrera-Escoda, A (2010) Projeccions i  
13 Escenaris futurs J.E. Llebot (Ed.), 2n Informe sobre el Canvi Climatic a Catalunya, Grup d'Experts  
14 en Canvi Climatic de Catalunya. Generalitat de Catalunya i Institut d'Estudis Catalans, Barcelona.  
15 PP: 183-239.

16 Coe, J.A., Godt, J.W (2012) Review of approaches for assessing the impact of climate change  
17 on landslide hazards. In: Eberhardt, E., Froese, C., Turner, A.K., Leroueil, S.(Eds.), *Landslides*  
18 *and Engineered Slopes, Protecting Society Through Improved Understanding: Proceedings 11th*  
19 *International and 2nd North American Symposium on Landslides and Engineered Slopes, Banff,*  
20 *Canada 1.* Taylor & Francis Group, London. PP: 371–377.

21 Floor van den Heuvel., Stéphane Goyette., Kazi Rahman., Markus Stoffel (2016) Circulation  
22 patterns related to debris-flow triggering in the Zermatt valley in current and future climates.  
23 *Geomorphology* 272:127–136.

24 Gabriella Szépszó., Imke Lingemann., Bastian Klein., Mária Kovács (2014) Impact of climate  
25 change on hydrological conditions of Rhine and Upper Danube rivers based on the results of  
26 regional climate and hydrological models. *Natural Hazards* 1: 241–262.

27 Gutiérrez, F., Parise, M., De Waele, J., Jourde, H (2014) A review on natural and human-  
28 induced geohazards and impacts in karst. *Earth-Science Reviews* 138: 61-88.

29 Han Xiao., Yong Je Kim., Boo Hyun Nam., Dingbao Wang (2016) Investigation of the  
30 impacts of local-scale hydrogeologic conditions on sinkhole occurrence in East-Central Florida,  
31 USA. *Environmental Earth sciences* 75:1274.

32 IPCC, *Climate Change 2013: The Physical Science Basis -Technical Summary (PDF)*. PP 89-  
33 90.

34 Jie Dong., Xue-feng Jia (2004) Possible impacts of global climate on natural disasters. *Journal*  
35 *of Liaocheng Teachers College(Natural Science Edition)* 2: 58-62 (in Chinese).

36 **Keetch, J.J., Byram, G.M (1968) A drought index for forest fire control. *USDA forest service***  
37 **southern research station. SE-38:1-32.**

38 Mingtang Lei., Yongli Gao., Xiaozhen Jiang (2015) Current Status and Strategic Planning of  
39 Sinkhole Collapses in China. *Engineering Geology for Society and Territory* 5: 529-533.

40 Mulec, J., Prelovšek. M (2015) Freshwater biodissolution rates of limestone in the temperate  
41 climate of the Dinaric karst in Slovenia. *Geomorphology* 228:787-795.

42 Seneviratne, S.I., Nicholls, N., Easterling, D., Goodess, C.M., Kanae, S., Kossin, J., Luo, Y.,



- 1 Marengo, J., McInnes, K., Rahimi, M., Reichstein, M., Sorteberg, A., Vera, C., Zhang, X (2012)  
2 Changes in climate extremes and their impacts on the natural physical environment. In: Field,  
3 C.B., Barros, V., Stocker, T.F., Qin, D., Dokken, D.J., Ebi, K.L., Mastrandrea, M.D., Mach, K.J.,  
4 Plattner, G.-K., Allen, S.K., Tignor, M., Midgley, P.M. (Eds.), *Managing the Risks of Extreme*  
5 *Events and Disasters to Advance Climate Change Adaptation*. A Special Report of Working  
6 Groups I and II of the Intergovernmental Panel on Climate Change (IPCC). Cambridge University  
7 Press, Cambridge, UK, and New York, NY, USA, pp. 109–230.
- 8 Stefano Luigi Gariano., Fausto Guzzetti (2016) Landslides in a changing climate. *Earth-Science*  
9 *Reviews* 162:227–252.
- 10 Thea Turkington., Alexandre Remaître., Janneke Ettema., Haydar Hussin., Cees van Westen  
11 (2016) Assessing debris flow activity in a changing climate. *Climatic Change* 137: 293–305.
- 12 **Thornbush MJ (2017) Part 2: Spatial-Temporal Occurrences of Sinkholes as a Complex**  
13 **Geohazard in Florida, USA. *Journal of Geology & Geophysics* 6(3):286-292.**
- 14 Wenxin Shi., Shuo Wang., Qianqian Yang (2010) Climate change and global warming.  
15 *Reviews in Environmental Science and Bio/Technology* 2: 99–102.
- 16 Yongming Lin., Haojun Deng., Kun Du., Loretta Rafay., Guangshuai Zhang., Jian Li., Can  
17 Chen., Chengzhen Wu., Han Lin., Wei Yu., Hailan Fan., Yonggang Ge (2017) Combined effects of  
18 climate, restoration measures and slope position in change in soil chemical properties and nutrient  
19 loss across lands affected by the Wenchuan Earthquake in China. *Science of The Total*  
20 *Environment* 596:274-283.
- 21 **Yuan Daoxian (1997) Modern karstology and global change study. *Earth Science Frontiers* 4**  
22 **(1): 17-25 (In Chinese).**
- 23 Zhou, Y.F., Tham, L.G., Yan, R.W.M., Xu. L (2014) The mechanism of soil failures along  
24 cracks subjected to water infiltration. *Computers and Geotechnics* 55: 330-341.
